# Supplementary material for: Prospective association between ultra-processed food consumption and incident depressive symptoms in the French NutriNet-Santé cohort
Source: PubMed Central journal article supplement (PMC6463641; doi:10.1186/s12916-019-1312-y), 2019-04-15
Supplement: 12916_2019_1312_MOESM1_ESM.pdf [file 12916_2019_1312_MOESM1_ESM.pdf]

Supplementary data

**Supplemental Table 1** Loading coefficients of the PCA-extracted dietary patterns

| <b>Food groups</b>            | <b>Loading coefficients</b> |                        |
|-------------------------------|-----------------------------|------------------------|
|                               | <b>Healthy Pattern</b>      | <b>Western Pattern</b> |
| <b>% the initial variance</b> | 10.5                        | 7.71                   |
| Whole grain products          | 0.49                        |                        |
| Breakfast cereals             |                             |                        |
| Non-whole grain products      |                             | 0.56                   |
| Legumes                       | 0.31                        |                        |
| Potatoes                      |                             | 0.57                   |
| Other starchy foods/Tubers    |                             |                        |
| Dairy products                |                             |                        |
| Olive oil                     | 0.46                        |                        |
| Other vegetable oils          |                             | 0.41                   |
| Broths/Added fat              | 0.37                        | 0.31                   |
| Fatty/salty/sweet products    |                             |                        |
| Vegetables                    | 0.75                        |                        |
| Vegetable juice               |                             |                        |
| Fruit                         | 0.58                        |                        |
| Fruit juice                   |                             |                        |
| Meat                          |                             | 0.54                   |
| Processed meat                |                             | 0.41                   |
| Fish and seafood              | 0.36                        |                        |
| Eggs                          |                             |                        |
| Alcoholic drinks              |                             | 0.42                   |
| Sweetened drinks              | -0.36                       |                        |
| Unsweetened drinks            | 0.36                        |                        |

Only food groups with |loading coefficients| > 0.3 are presented
