# Supplementary material for: Prospective association between ultra-processed food consumption and incident depressive symptoms in the French NutriNet-Santé cohort
Source: PubMed Central journal article supplement (PMC6463641; doi:10.1186/s12916-019-1312-y), 2019-04-15
Supplement: 12916_2019_1312_MOESM4_ESM.pdf [file 12916_2019_1312_MOESM4_ESM.pdf]

Supplementary data

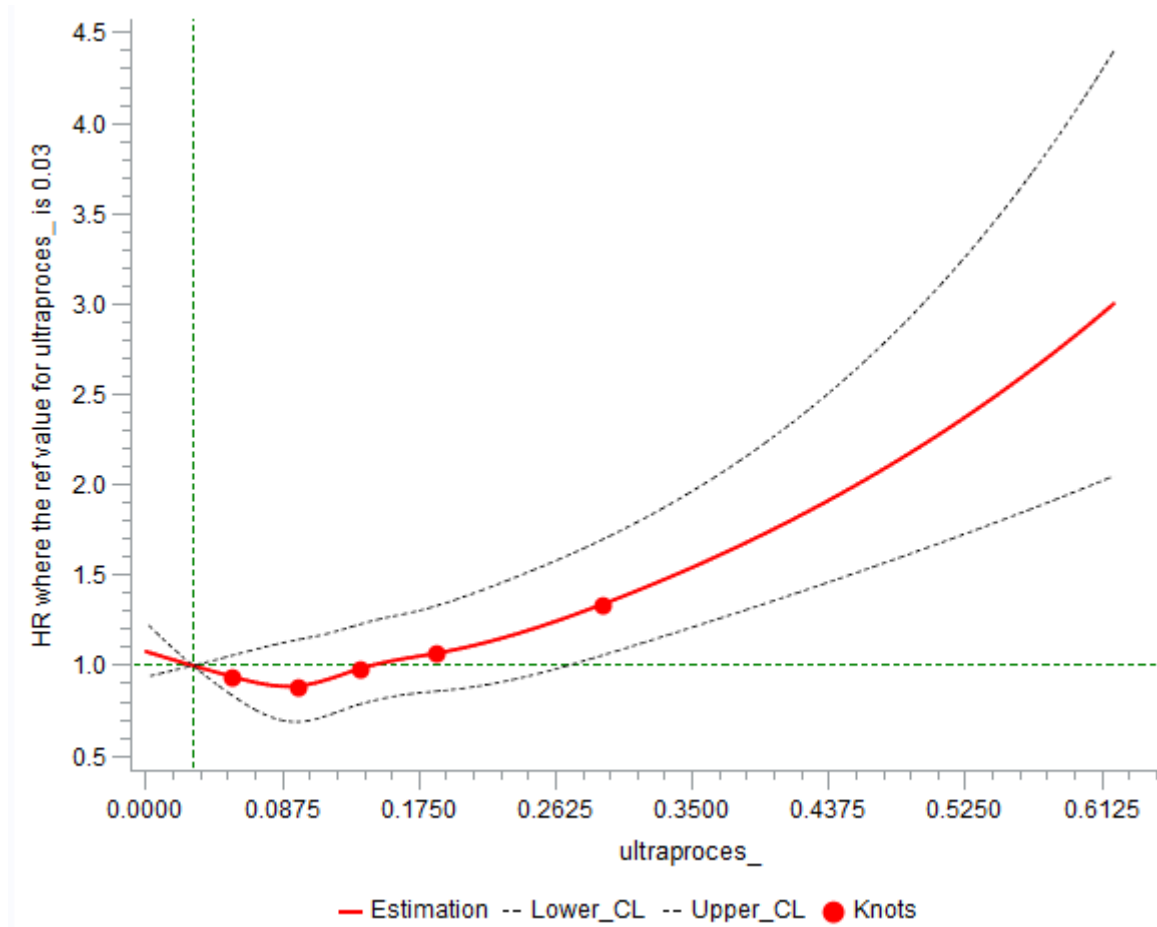

**Supplemental Figure 1** Dose-response association between ultra-processed food intake and incident depressive symptoms using Restricted Cubic Spline
