# Supplementary material for: Prospective association between ultra-processed food consumption and incident depressive symptoms in the French NutriNet-Santé cohort
Source: PubMed Central journal article supplement (PMC6463641; doi:10.1186/s12916-019-1312-y), 2019-04-15
Supplement: 12916_2019_1312_MOESM5_ESM.pdf [file 12916_2019_1312_MOESM5_ESM.pdf]

Supplementary data

**Supplemental Table 4** Association between ultra-processed food intake and incident depressive symptoms using other cut-off values to define depressive symptoms, NutriNet-Santé study <sup>a</sup>

|                            | Quartile 1 | Quartile 2        | Quartile 3        | Quartile          | P-trend | Continuous <sup>b</sup> | P <sup>c</sup> |
|----------------------------|------------|-------------------|-------------------|-------------------|---------|-------------------------|----------------|
| <b>Cut-off value of 16</b> |            |                   |                   |                   |         |                         |                |
| UPF, range                 | 0%-10%     | 10%-14%           | 14%-18%           | 18%-76%           |         |                         |                |
| UPF, median (IQR)          | 7% (3%)    | 12% (2%)          | 16% (2%)          | 23% (7%)          |         |                         |                |
| n                          | 5,909      | 5,910             | 5,910             | 5,910             |         | 23,639                  |                |
| Number of cases            | 827        | 796               | 902               | 1,082             |         | 3,607                   |                |
| Model 1 <sup>d</sup>       | 1 (ref)    | 0.94 (0.85; 1.04) | 1.06 (0.96; 1.17) | 1.22 (1.11; 1.34) | <0.0001 | 1.15 (1.10; 1.20)       | <0.0001        |
| Model 2 <sup>e</sup>       | 1 (ref)    | 0.95 (0.86; 1.05) | 1.07 (0.98; 1.18) | 1.22 (1.11; 1.35) | <0.0001 | 1.14 (1.09; 1.19)       | <0.0001        |
| Model 3 <sup>f</sup>       | 1 (ref)    | 0.95 (0.86; 1.05) | 1.07 (0.97; 1.19) | 1.22 (1.10; 1.35) | <0.0001 | 1.15 (1.10; 1.20)       | <0.0001        |
| Model 4 <sup>g</sup>       | 1 (ref)    | 0.95 (0.86; 1.05) | 1.07 (0.97; 1.18) | 1.22 (1.11; 1.35) | <0.0001 | 1.14 (1.09; 1.19)       | <0.0001        |
| Model 5 <sup>h</sup>       | 1 (ref)    | 0.91 (0.83; 1.01) | 1.01 (0.91; 1.11) | 1.13 (1.02; 1.24) | 0.002   | 1.10 (1.05; 1.14)       | <0.0001        |
| Model 6 <sup>i</sup>       | 1 (ref)    | 0.93 (0.84; 1.02) | 1.05 (0.95; 1.16) | 1.21 (1.10; 1.33) | <0.0001 | 1.14 (1.09; 1.19)       | <0.0001        |
| Model 7 <sup>j</sup>       | 1 (ref)    | 0.91 (0.82; 1.00) | 1.00 (0.91; 1.10) | 1.13 (1.03; 1.25) | 0.002   | 1.10 (1.05; 1.15)       | <0.0001        |
| <b>Cut-off value of 19</b> |            |                   |                   |                   |         |                         |                |
| UPF, range                 | 0%-10%     | 10%-14%           | 14%-19%           | 19%-76%           |         |                         |                |
| UPF, median (IQR)          | 7% (3%)    | 12% (2%)          | 16% (2%)          | 23% (8%)          |         |                         |                |
| n                          | 6,400      | 6,400             | 6,400             | 64,00             |         | 25,600                  |                |
| Number of cases            | 634        | 580               | 697               | 888               |         | 2,799                   |                |
| Model 1 <sup>d</sup>       | 1 (ref)    | 0.89 (0.80; 1.00) | 1.05 (0.94; 1.17) | 1.28 (1.15; 1.42) | <0.0001 | 1.20 (1.14; 1.25)       | <0.0001        |
| Model 2 <sup>e</sup>       | 1 (ref)    | 0.91 (0.81; 1.02) | 1.07 (0.96; 1.19) | 1.28 (1.14; 1.42) | <0.0001 | 1.18 (1.13; 1.23)       | <0.0001        |
| Model 3 <sup>f</sup>       | 1 (ref)    | 0.90 (0.80; 1.01) | 1.06 (0.95; 1.19) | 1.26 (1.12; 1.41) | <0.0001 | 1.18 (1.13; 1.24)       | <0.0001        |
| Model 4 <sup>g</sup>       | 1 (ref)    | 0.91 (0.81; 1.02) | 1.06 (0.95; 1.19) | 1.28 (1.14; 1.42) | <0.0001 | 1.18 (1.13; 1.23)       | <0.0001        |
| Model 5 <sup>h</sup>       | 1 (ref)    | 0.87 (0.78; 0.98) | 1.01 (0.90; 1.13) | 1.16 (1.04; 1.30) | 0.0004  | 1.14 (1.08; 1.19)       | <0.0001        |
| Model 6 <sup>i</sup>       | 1 (ref)    | 0.88 (0.79; 0.99) | 1.04 (0.93; 1.17) | 1.26 (1.13; 1.41) | <0.0001 | 1.18 (1.13; 1.24)       | <0.0001        |
| Model 7 <sup>j</sup>       | 1 (ref)    | 0.86 (0.77; 0.97) | 1.01 (0.90; 1.12) | 1.17 (1.05; 1.30) | 0.0002  | 1.14 (1.09; 1.19)       | <0.0001        |

<sup>a</sup> Values are hazard ratios (95% confidence intervals). *CDS* Cognitive Difficulties Scale; *CES-D* Center for Epidemiologic Studies Depression Scale; *IQR* Interquartile Range; *UPF* Proportion of ultra-processed food intake

<sup>b</sup> Hazard ratios for 10% increase in the proportion of ultra-processed food intake

<sup>c</sup> P for continuous variable

<sup>d</sup> Adjusted for age, sex and body mass index

<sup>e</sup> Adjusted for all variables in model 1 + marital status, educational level, occupational categories, household income per consumption unit, residential area, number of 24h-dietary records, inclusion month, energy intake without alcohol, alcohol intake, smoking status and physical activity (main model)

<sup>f</sup> Adjusted for all variables in model 2 + dietary patterns derived from the factor analysis (“Healthy” and “Western” dietary pattern) and intakes of lipids, sodium, and carbohydrates

<sup>g</sup> Adjusted for all variables in model 2 + health events during follow-up (cancer, Type 2 diabetes, hypertension and cardiovascular events)

<sup>h</sup> Adjusted for all variables in model 2 + use of antidepressants during follow-up and baseline CES-D score

<sup>i</sup> Adjusted for all variables in model 2 + CDS score

<sup>j</sup> Adjusted for all variables in model 2 + use of antidepressants during follow-up, baseline CES-D score and CDS score
