# Supplementary material for: Prospective association between ultra-processed food consumption and incident depressive symptoms in the French NutriNet-Santé cohort
Source: PubMed Central journal article supplement (PMC6463641; doi:10.1186/s12916-019-1312-y), 2019-04-15
Supplement: 12916_2019_1312_MOESM6_ESM.pdf [file 12916_2019_1312_MOESM6_ESM.pdf]

Supplementary data

**Supplemental Table 5** Association between ultra-processed food intake (% of energy) and incident depressive symptoms, NutriNet-Santé study <sup>a</sup>

|                      | Quartile 1 | Quartile 2        | Quartile 3        | Quartile 4        | P-trend | Continuous <sup>b</sup> | P <sup>c</sup> |
|----------------------|------------|-------------------|-------------------|-------------------|---------|-------------------------|----------------|
| UPF_EI, range        | 0%-24%     | 24%-31%           | 31%-39%           | 39%-83%           |         |                         |                |
| UPF_EI, median (IQR) | 19% (6%)   | 27% (3%)          | 35% (4%)          | 46% (9%)          |         |                         |                |
| n                    | 6,682      | 6,683             | 6,683             | 6,682             |         | 26730                   |                |
| Number of cases      | 444        | 493               | 552               | 732               |         | 2,221                   |                |
| Model 1 <sup>d</sup> | 1 (ref)    | 1.06 (0.93; 1.21) | 1.11 (0.97; 1.26) | 1.36 (1.19; 1.55) | <0.0001 | 1.12 (1.08; 1.17)       | <0.0001        |
| Model 2 <sup>e</sup> | 1 (ref)    | 1.07 (0.94; 1.21) | 1.11 (0.98; 1.26) | 1.32 (1.15; 1.50) | <0.0001 | 1.10 (1.06; 1.15)       | <0.0001        |
| Model 3 <sup>f</sup> | 1 (ref)    | 1.07 (0.94; 1.22) | 1.12 (0.98; 1.28) | 1.33 (1.15; 1.54) | 0.0001  | 1.11 (1.06; 1.16)       | <0.0001        |
| Model 4 <sup>g</sup> | 1 (ref)    | 1.07 (0.94; 1.22) | 1.12 (0.98; 1.27) | 1.32 (1.16; 1.51) | <0.0001 | 1.10 (1.06; 1.15)       | <0.0001        |
| Model 5 <sup>h</sup> | 1 (ref)    | 1.02 (0.90; 1.16) | 1.07 (0.94; 1.22) | 1.15 (1.01; 1.32) | 0.02    | 1.06 (1.02; 1.10)       | 0.004          |
| Model 6 <sup>i</sup> | 1 (ref)    | 1.03 (0.91; 1.17) | 1.08 (0.95; 1.23) | 1.28 (1.12; 1.46) | 0.0001  | 1.10 (1.06; 1.14)       | <0.0001        |
| Model 7 <sup>j</sup> | 1 (ref)    | 1.00 (0.88; 1.14) | 1.06 (0.93; 1.21) | 1.15 (1.01; 1.31) | 0.02    | 1.06 (1.02; 1.11)       | 0.003          |

<sup>a</sup> Values are hazard ratios (95% confidence intervals). *CDS* Cognitive Difficulties Scale; *CES-D* Center for Epidemiologic Studies Depression Scale; *IQR* Interquartile Range; *UPF* Proportion of ultra-processed food intake

<sup>b</sup> Hazard ratios for 10% increase in the proportion of ultra-processed food intake

<sup>c</sup> P for continuous variable

<sup>d</sup> Adjusted for age, sex and body mass index

<sup>e</sup> Adjusted for all variables in model 1 + marital status, educational level, occupational categories, household income per consumption unit, residential area, number of 24h-dietary records, inclusion month, energy intake without alcohol, alcohol intake, smoking status and physical activity (main model)

<sup>f</sup> Adjusted for all variables in model 2 + dietary patterns derived from the factor analysis ("Healthy" and "Western" dietary pattern) and intakes of lipids, sodium, and carbohydrates

<sup>g</sup> Adjusted for all variables in model 2 + health events during follow-up (cancer, Type 2 diabetes, hypertension and cardiovascular events)

<sup>h</sup> Adjusted for all variables in model 2 + use of antidepressants during follow-up and baseline CES-D score

<sup>i</sup> Adjusted for all variables in model 2 + CDS score

<sup>j</sup> Adjusted for all variables in model 2 + use of antidepressants during follow-up, baseline CES-D score and CDS score
