# Supplementary material for: Prospective association between ultra-processed food consumption and incident depressive symptoms in the French NutriNet-Santé cohort
Source: PubMed Central journal article supplement (PMC6463641; doi:10.1186/s12916-019-1312-y), 2019-04-15
Supplement: 12916_2019_1312_MOESM7_ESM.pdf [file 12916_2019_1312_MOESM7_ESM.pdf]

Supplementary data

**Supplemental Table 6** Association between ultra-processed food intake and incident depressive symptoms (considering as cases, only the participants who had depressive symptoms and also reported antidepressant treatment during follow-up), NutriNet-Santé study <sup>a</sup>

|                      | Quartile 1 | Quartile 2        | Quartile 3        | Quartile 4        | P-trend | Continuous <sup>b</sup> | P <sup>c</sup> |
|----------------------|------------|-------------------|-------------------|-------------------|---------|-------------------------|----------------|
| UPF_EI, range        | 0%-24%     | 24%-31%           | 31%-39%           | 39%-83%           |         |                         |                |
| UPF_EI, median (IQR) | 19% (6%)   | 27% (3%)          | 35% (4%)          | 46% (9%)          |         |                         |                |
| n                    | 6,682      | 6,683             | 6,683             | 6,682             |         | 26,730                  |                |
| Number of cases      | 27         | 22                | 28                | 36                |         | 113                     |                |
| Model 1 <sup>d</sup> | 1 (ref)    | 0.80 (0.45; 1.41) | 1.01 (0.59; 1.72) | 1.32 (0.78; 2.21) | 0.20    | 1.44 (1.19; 1.76)       | 0.0002         |
| Model 2 <sup>e</sup> | 1 (ref)    | 0.86 (0.48; 1.51) | 1.09 (0.63; 1.87) | 1.39 (0.82; 2.37) | 0.15    | 1.43 (1.18; 1.73)       | 0.0003         |
| Model 3 <sup>f</sup> | 1 (ref)    | 0.87 (0.49; 1.54) | 1.11 (0.64; 1.94) | 1.45 (0.83; 2.54) | 0.13    | 1.51 (1.22; 1.85)       | 0.0001         |
| Model 4 <sup>g</sup> | 1 (ref)    | 0.81 (0.45; 1.43) | 1.07 (0.62; 1.84) | 1.38 (0.81; 2.35) | 0.15    | 1.43 (1.18; 1.74)       | 0.0003         |
| Model 5 <sup>h</sup> | 1 (ref)    | 0.81 (0.46; 1.42) | 1.01 (0.59; 1.74) | 1.21 (0.71; 2.07) | 0.34    | 1.36 (1.12; 1.65)       | 0.002          |
| Model 6 <sup>i</sup> | 1 (ref)    | 0.83 (0.47; 1.46) | 1.07 (0.62; 1.84) | 1.36 (0.80; 2.32) | 0.17    | 1.42 (1.17; 1.72)       | 0.0004         |
| Model 7 <sup>j</sup> | 1 (ref)    | 0.80 (0.45; 1.42) | 1.02 (0.59; 1.75) | 1.22 (0.71; 2.08) | 0.33    | 1.36 (1.12; 1.65)       | 0.002          |

<sup>a</sup> Values are hazard ratios (95% confidence intervals). *CDS* Cognitive Difficulties Scale; *CES-D* Center for Epidemiologic Studies Depression Scale; *IQR* Interquartile Range; *UPF* Proportion of ultra-processed food intake

<sup>b</sup> Hazard ratios for 10% increase in the proportion of ultra-processed food intake

<sup>c</sup> P for continuous variable

<sup>d</sup> Adjusted for age, sex and body mass index

<sup>e</sup> Adjusted for all variables in model 1 + marital status, educational level, occupational categories, household income per consumption unit, residential area, number of 24h-dietary records, inclusion month, energy intake without alcohol, alcohol intake, smoking status and physical activity (main model)

<sup>f</sup> Adjusted for all variables in model 2 + dietary patterns derived from the factor analysis (“Healthy” and “Western” dietary pattern) and intakes of lipids, sodium, and carbohydrates

<sup>g</sup> Adjusted for all variables in model 2 + health events during follow-up (cancer, Type 2 diabetes, hypertension and cardiovascular events)

<sup>h</sup> Adjusted for all variables in model 2 + baseline CES-D score

<sup>i</sup> Adjusted for all variables in model 2 + CDS score

<sup>j</sup> Adjusted for all variables in model 2 + baseline CES-D score and CDS score
