# Supplementary material for: Prospective association between ultra-processed food consumption and incident depressive symptoms in the French NutriNet-Santé cohort
Source: Springer Nature journal article supplement (doi:10.1186/s12916-019-1312-y), 2019-04-15
Supplement: MOESM2 [file 16657466]

Supplementary data

**Supplemental Table 2** Comparison of participants who completed one CES-D questionnaire to those who completed it at least two during follow-up, NutriNet-Santé study <sup>a</sup>

| Baseline characteristics                                         | 1 completed CES-D questionnaire | At least 2 completed CES-D questionnaires | P <sup>b</sup> |
|------------------------------------------------------------------|---------------------------------|-------------------------------------------|----------------|
| <b><i>n</i></b>                                                  | 24,154                          | 40,831                                    |                |
| <b>Age, y</b>                                                    | 42.2 ± 14.5                     | 47.3 ± 14.1                               | <0.0001        |
| <b>Sex, <i>n</i> (%)</b>                                         |                                 |                                           | <0.0001        |
| Male                                                             | 4,803 (19.9)                    | 9,820 (24.0)                              |                |
| Female                                                           | 19,351 (80.1)                   | 31,011 (76.0)                             |                |
| <b>Marital status, <i>n</i> (%)</b>                              |                                 |                                           | <0.0001        |
| Living alone                                                     | 4,516 (18.7)                    | 6,122 (15.0)                              |                |
| Cohabiting                                                       | 17,315 (71.7)                   | 30,194 (73.9)                             |                |
| Separated/Divorced/Widowed                                       | 2,323 (9.6)                     | 4,515 (11.1)                              |                |
| <b>Educational level, <i>n</i> (%)</b>                           |                                 |                                           | <0.0001        |
| < High school diploma                                            | 4,610 (19.1)                    | 8,440 (20.7)                              |                |
| High school diploma                                              | 4,084 (16.9)                    | 6,469 (15.8)                              |                |
| University level                                                 | 15,460 (64.0)                   | 25,922 (63.5)                             |                |
| <b>Occupational categories, <i>n</i> (%)</b>                     |                                 |                                           | <0.0001        |
| Never-employed/other activity                                    | 1,327 (5.5)                     | 1,351 (3.3)                               |                |
| Self-employed                                                    | 1,493 (6.2)                     | 2,192 (5.4)                               |                |
| Employee                                                         | 7,473 (30.9)                    | 10,657 (26.1)                             |                |
| Intermediate profession                                          | 6,231 (25.8)                    | 11,676 (28.6)                             |                |
| Managerial staff                                                 | 7,630 (31.6)                    | 14,955 (36.6)                             |                |
| <b>Household income per consumption unit, <i>n</i> (%)</b>       |                                 |                                           | <0.0001        |
| Not answered                                                     | 2,943 (12.2)                    | 4,120 (10.1)                              |                |
| < 1200 euros                                                     | 4,333 (17.9)                    | 5,476 (13.4)                              |                |
| 1200-1800 euros                                                  | 6,163 (25.5)                    | 9,674 (23.7)                              |                |
| 1800-2700 euros                                                  | 5,558 (23.0)                    | 10,266 (25.1)                             |                |
| ≥ 2700 euros                                                     | 5,157 (21.4)                    | 11,295 (27.7)                             |                |
| <b>Residential area, <i>n</i> (%)</b>                            |                                 |                                           | <0.0001        |
| Rural                                                            | 5,182 (21.4)                    | 8,917 (21.8)                              |                |
| Urban                                                            | 18,972 (78.6)                   | 31,914 (78.2)                             |                |
| <b>Smoking status, <i>n</i> (%)</b>                              |                                 |                                           | <0.0001        |
| Former smoker                                                    | 7,942 (32.9)                    | 14,897 (36.5)                             |                |
| Current smoker                                                   | 4,189 (17.3)                    | 5,283 (12.9)                              |                |
| Never-smoker                                                     | 12,023 (49.8)                   | 20,651 (50.6)                             |                |
| <b>Physical activity <sup>c</sup>, <i>n</i> (%)</b>              |                                 |                                           | <0.0001        |
| Low                                                              | 6,750 (27.9)                    | 10,118 (24.8)                             |                |
| Moderate                                                         | 5,907 (24.5)                    | 9,691 (23.7)                              |                |
| High                                                             | 11,497 (47.6)                   | 21,022 (51.5)                             |                |
| <b>Body mass index <sup>d</sup>, <i>n</i> (%)</b>                |                                 |                                           | <0.0001        |
| Underweight                                                      | 1,260 (5.2)                     | 1,940 (4.8)                               |                |
| Normal weight                                                    | 15,335 (63.5)                   | 26,225 (64.2)                             |                |
| Overweight                                                       | 5,095 (21.1)                    | 9,178 (22.5)                              |                |
| Obesity                                                          | 2,464 (10.2)                    | 3,488 (8.5)                               |                |
| <b>Prevalence of chronic diseases <sup>e</sup>, <i>n</i> (%)</b> | 1,068 (4.4)                     | 4,420 (10.9)                              | <0.0001        |
| <b>Baseline CES-D score</b>                                      | 12.4 ± 9.4                      | 10.9 ± 8.7                                | <0.0001        |

CES-D Center for Epidemiologic Studies Depression Scale

<sup>a</sup> Values are means ± standard deviation or numbers (percentages) as appropriate

<sup>b</sup> P-values are based on T-test or chi-square test

<sup>c</sup> Physical activity was classified as low (< 30 minutes of physical activity; equivalent to brisk walking/day), moderate (30-60 min) and high (≥ 60 min)

<sup>d</sup> Body mass index (BMI) was classified as underweight (BMI < 18.5), normal weight (18.5 < BMI < 25), overweight (25 ≤ BMI < 30) and obesity (BMI ≥ 30)

<sup>e</sup> Incident cases of cancer, Type 2 diabetes, hypertension and cardiovascular diseases
