# Supplementary material for: Prospective association between ultra-processed food consumption and incident depressive symptoms in the French NutriNet-Santé cohort
Source: Springer Nature journal article supplement (doi:10.1186/s12916-019-1312-y), 2019-04-15
Supplement: MOESM3 [file 16657466]

Supplementary data

**Supplemental Table 3** Comparison of included and excluded participants, NutriNet-Santé study <sup>a</sup>

| Baseline characteristics                                  | Excluded participants | Included participants | P <sup>b</sup> |
|-----------------------------------------------------------|-----------------------|-----------------------|----------------|
| <b>n</b>                                                  | 9,052                 | 26,730                |                |
| <b>Age, y</b>                                             | 48.1 ± 13.8           | 47.3 ± 14.2           | <0.0001        |
| <b>Sex, n (%)</b>                                         |                       |                       | 0.001          |
| Male                                                      | 2,002 (22.1)          | 6,350 (23.8)          |                |
| Female                                                    | 7,050 (77.9)          | 20,380 (76.2)         |                |
| <b>% UPF in the diet</b>                                  | 15% ±8%               | 15% ±8%               | 0.47           |
| <b>Marital status, n (%)</b>                              |                       |                       | <0.0001        |
| Living alone                                              | 1,388 (15.3)          | 3,648 (13.7)          |                |
| Cohabiting                                                | 6,571 (72.6)          | 20,324 (76.0)         |                |
| Separated/Divorced/Widowed                                | 1,093 (12.1)          | 2,758 (10.3)          |                |
| <b>Educational level, n (%)</b>                           |                       |                       | <0.0001        |
| < High school diploma                                     | 1,998 (22.1)          | 5189 (19.4)           |                |
| High school diploma                                       | 1,431 (15.8)          | 4129 (15.5)           |                |
| University level                                          | 5,623 (62.1)          | 17412 (65.1)          |                |
| <b>Occupational categories, n (%)</b>                     |                       |                       | <0.0001        |
| Never-employed/other activity                             | 283 (3.1)             | 847 (3.2)             |                |
| Self-employed                                             | 474 (5.2)             | 1,351 (5.1)           |                |
| Employee                                                  | 2,404 (26.6)          | 6,503 (24.3)          |                |
| Intermediate profession                                   | 2,663 (29.4)          | 7,813 (29.2)          |                |
| Managerial staff                                          | 3,228 (35.7)          | 10,216 (38.2)         |                |
| <b>Household income per consumption unit, n (%)</b>       |                       |                       | 0.001          |
| Not answered                                              | 920 (10.2)            | 2,649 (9.9)           |                |
| < 1200 euros                                              | 1,198 (13.2)          | 3,242 (12.1)          |                |
| 1200-1800 euros                                           | 2,186 (24.1)          | 6,186 (23.1)          |                |
| 1800-2700 euros                                           | 2,271 (25.1)          | 6,824 (25.5)          |                |
| ≥ 2700 euros                                              | 2,477 (27.4)          | 7,829 (29.3)          |                |
| <b>Residential area, n (%)</b>                            |                       |                       | 0.04           |
| Rural                                                     | 1,900 (21.0)          | 5,893 (22.0)          |                |
| Urban                                                     | 7,152 (79.0)          | 20,837 (78.0)         |                |
| <b>Smoking status, n (%)</b>                              |                       |                       | <0.0001        |
| Former smoker                                             | 3,341 (36.9)          | 9,730 (36.4)          |                |
| Current smoker                                            | 1,239 (13.7)          | 3,206 (12.0)          |                |
| Never-smoker                                              | 4,472 (49.4)          | 13,794 (51.6)         |                |
| <b>Physical activity <sup>c</sup>, n (%)</b>              |                       |                       | 0.07           |
| Low                                                       | 2,260 (25.0)          | 6,368 (23.8)          |                |
| Moderate                                                  | 2,155 (23.8)          | 6,371 (23.8)          |                |
| High                                                      | 4,637 (51.2)          | 13,991 (52.4)         |                |
| <b>Body mass index <sup>d</sup>, n (%)</b>                |                       |                       | <0.0001        |
| Underweight                                               | 431 (4.8)             | 1,192 (4.5)           |                |
| Normal weight                                             | 5,638 (62.3)          | 17,716 (66.3)         |                |
| Overweight                                                | 2,112 (23.3)          | 5,861 (21.9)          |                |
| Obesity                                                   | 871 (9.6)             | 1,961 (7.3)           |                |
| <b>Prevalence of chronic diseases <sup>e</sup>, n (%)</b> | 1,059 (11.8)          | 2,707 (10.2)          | <0.0001        |

UPF Proportion of ultra-processed food intake

<sup>a</sup> Values are means ± standard deviation or numbers (percentages) as appropriate

<sup>b</sup> P-values are based on T-test or chi-square test

<sup>c</sup> Physical activity was classified as low (< 30 minutes of physical activity; equivalent to brisk walking/day), moderate (30-60 min) and high (≥ 60 min)

<sup>d</sup> Body mass index (BMI) was classified as underweight (BMI < 18.5), normal weight (18.5 < BMI < 25), overweight (25 ≤ BMI < 30) and obesity (BMI ≥ 30)

<sup>e</sup> Incident cases of cancer, Type 2 diabetes, hypertension and cardiovascular diseases
